# Supplementary material
Source: publisher figshare collection journal article supplement (https://gsapubs.figshare.com/ndownloader/files/22744265)
Supplement: Supplementary file 1 [file 22744265]

TABLE DR1. FIELD LOCATIONS AND ALTITUDES

| Station                                                               | USGS<br>7.5' quadrangle | UTM NAD 83 Zone 11<br>East | North          | Altitude<br>(m)* | Location notes                                                                                                                                                                                                                           |
|-----------------------------------------------------------------------|-------------------------|----------------------------|----------------|------------------|------------------------------------------------------------------------------------------------------------------------------------------------------------------------------------------------------------------------------------------|
| <i>Afton Canyon, south rim sites</i>                                  |                         |                            |                |                  |                                                                                                                                                                                                                                          |
| M03-43                                                                | Cave Mountain           | 559260                     | 3874998        | 548              | Western possible capture point on south rim. Underlain by indurated, interbedded arkosic sandstone and conglomerate                                                                                                                      |
| M03-44                                                                | Cave Mountain           | 560425                     | 3875232        | 518              | Low terraces on N side of tributary to Baxter Wash; tributary leads to eastern possible capture point. Consist of <0.5 m-thick angular gravel derived from nearby Tertiary fanglomerate overlying surface cut on weathered clayey gravel |
| M03-45                                                                | Cave Mountain           | 559899                     | 3875400        | 534              | Eastern possible capture point on south rim. Underlain by Tertiary mudstone and sandstone interfingering with fanglomerate                                                                                                               |
| <i>Afton Canyon, high fluvial deposits with no terrace morphology</i> |                         |                            |                |                  |                                                                                                                                                                                                                                          |
| JR04CM-87                                                             | Cave Mountain           | <b>558726</b>              | <b>3876135</b> | <b>537.7</b>     | High fluvial gravel and sand, Mojave river origin, buried by fan deposits; soil description site                                                                                                                                         |
| JR04CM-88                                                             | Cave Mountain           | 558830                     | 3876370        | 536              | High fluvial gravel and sand, Mojave river origin, buried by fan deposits; soil description site                                                                                                                                         |
| JR05CM-146                                                            | Cave Mountain           | 560908                     | 3876744        | >463             | Lagged Mojave River gravel cut into Tertiary conglomerate with ~3 meter scarp                                                                                                                                                            |
| JR05CM-153                                                            | Cave Mountain           | 561027                     | 3876772        | 463              | Surface lag of well rounded Mojave River gravel overlies gravelly alluvium interbedded with probable fluvial gravel, mostly locally sourced with few Mojave River clasts; some clasts reworked from former desert pavement               |
| JR05CM-144                                                            | Cave Mountain           | 561095                     | 3876814        | <463             | Mound of river gravel                                                                                                                                                                                                                    |
| <i>Afton Canyon, terrace deposits east of Lake Manix threshold</i>    |                         |                            |                |                  |                                                                                                                                                                                                                                          |
| JR04CM-85                                                             | Cave Mountain           | 558656                     | 3876207        | 512              | Strath terrace of Mojave River with rounded gravel                                                                                                                                                                                       |
| JR04CM-84                                                             | Cave Mountain           | 558659                     | 3876092        | 488              | Strath terrace of Mojave River with rounded gravel                                                                                                                                                                                       |
| JR04CM-82                                                             | Cave Mountain           | 558775                     | 3876193        | 512              | Strath terrace of Mojave River with rounded gravel                                                                                                                                                                                       |
| JR05CM-143                                                            | Cave Mountain           | 561130                     | 3876845        | 463              | A more eroded piece of the Mojave River terrace from site JR05CM-142                                                                                                                                                                     |
| JR05CM-142                                                            | Cave Mountain           | 561165                     | 3876867        | 451              | Eroded Mojave River terrace with well rounded, spherical gravel; back edge of fluvial terrace is 1-2 meter scarp, similar to site JR04CM-140. Recon. soil description--Av/C                                                              |
| JR05CM-138                                                            | Cave Mountain           | 561869                     | 3877358        | 433              | Well rounded sand (Mojave River?) interbedded with tributary fan deposits; surface clasts are well rounded and not local. Recon. soil description: Av/Bwk/Coxk                                                                           |
| JR04CM-103                                                            | Cave Mountain           | 562005                     | 3877389        | 427              | Mojave River terrace inset into site JR05CM-138. Recon. soil description: Av/Coxk, stage I+ carbonate and silica. Disturbed surface                                                                                                      |
| JR05CM-133                                                            | Cave Mountain           | 562176                     | 3877527        | <427             | Small piece of Mojave River terrace, inset into JR05CM-133; apparently same terrace as at JR05CM-121                                                                                                                                     |
| JR05CM-132                                                            | Cave Mountain           | 562215                     | 3877462        | 408              | Small, disturbed remnant of Mojave River terrace                                                                                                                                                                                         |
| JR05CM-121                                                            | Cave Mountain           | 562222                     | 3877723        | 415              | Fluvial terrace gravel with thin overlying fan deposit; some rounded and many subangular clasts                                                                                                                                          |
| JR05CM-124                                                            | Cave Mountain           | 562882                     | 3878187        | >402             | Fluvial terrace gravel with thin overlying fan deposit; soil description site                                                                                                                                                            |
| JR05CM-197                                                            | Cave Mountain           | 562339                     | 3877973        | 415              | Fluvial terrace, probably same surface as site JR05CM-121; soil description site                                                                                                                                                         |
| JR05CM-129                                                            | Cave Mountain           | 563173                     | 3878323        | 384              | Mojave river terrace 12-15 meters above river; variable lithologies, well rounded clasts                                                                                                                                                 |
| JR05CM-130                                                            | Cave Mountain           | 563394                     | 3878313        | 366              | Tributary gravel and sand overlying ~1 meter of Mojave River gravels.                                                                                                                                                                    |
| <i>Afton Canyon, terrace deposits west of Lake Manix threshold</i>    |                         |                            |                |                  |                                                                                                                                                                                                                                          |
| JR04CM-77                                                             | Cave Mountain           | 557594                     | 3876469        | 451              | Mojave River fluvial terrace; soil description site                                                                                                                                                                                      |
| JR04CM-67                                                             | Cave Mountain           | 557513                     | 3876697        | 439              | Thin fan covering Mojave River fluvial terrace.                                                                                                                                                                                          |
| JR05CM-152                                                            | Cave Mountain           | 557562                     | 3877076        | 439              | Eroded fan deposits overlying a strath terrace with sand and gravel 1-2 m thick                                                                                                                                                          |
| JR05CM-149                                                            | Cave Mountain           | 557412                     | 3877162        | 451              | Eroded fan deposit overlying fluvial sand and gravel; locally abundant fluvial deposits on interfluvies                                                                                                                                  |
| JR04CM-78                                                             | Cave Mountain           | 557270                     | 3876966        | <439             | Mojave River fluvial terrace; soil description site                                                                                                                                                                                      |
| JR04CM-92.5                                                           | Cave Mountain           | 557040                     | 3877534        | 463              | 10-12 strath terraces in sequence. Upper 7 terraces have south-facing back edges (generally ~1-2 m high) likely cut by right bank of Mojave River; lowest three terraces have north-facing back edges likely cut by left bank of river   |
| JR04CM-43                                                             | Cave Mountain           | 557008                     | 3876980        | 427              | Mojave River cut and fill terraces above here.                                                                                                                                                                                           |
| JR04D-95                                                              | Dunn                    | 556872                     | 3877730        | >463             | Highest strath terrace found; soil description site. Surface is eroding and partly covered by sand, thus soil development is minimum                                                                                                     |
| JR05D-198                                                             | Dunn                    | 556983                     | 3877763        | 469              | Alluvial fan deposit; soil description site; top of a thick, mostly tributary sourced, fill deposit overlying strath terraces cut to within about 12 m of modern Mojave River                                                            |

| Station                                                                           | USGS<br>7.5' quadrangle | UTM NAD 83 Zone 11<br>East | North          | Altitude<br>(m)* | Location notes                                                                                                                                                                                                                 |
|-----------------------------------------------------------------------------------|-------------------------|----------------------------|----------------|------------------|--------------------------------------------------------------------------------------------------------------------------------------------------------------------------------------------------------------------------------|
| JR05CM-156                                                                        | Cave Mountain           | 556292                     | 3877723        | 475              | Eroded tributary fan with interbedded sand and coarse gravel overlying Mojave River strath terrace with rounded cobbles and boulders                                                                                           |
| JR05D-157                                                                         | Dunn                    | 555969                     | 3877942        | <u>478</u>       | Alluvial fan overlying deposits of JR04D-68.                                                                                                                                                                                   |
| JR04D-68                                                                          | Dunn                    | 555946                     | 3877916        | <u>476</u>       | Slackwater and (or) lacustrine deposits. See Fig. 10 for stratigraphy, Table 1 for radiocarbon ages, and Table 2 for soil description on overlying fan deposits (JR05-157)                                                     |
| JR04D-70                                                                          | Dunn                    | 556058                     | 3878024        | <u>477</u>       | Intercalated colluvium and slackwater deposits of site JR04D-68                                                                                                                                                                |
| JR05D-178                                                                         | Dunn                    | 555358                     | 3877635        | <u>455</u>       | Possible beach barrier (?) overlying fluvial strath terrace                                                                                                                                                                    |
| JR05D-193                                                                         | Dunn                    | 555244                     | 3877251        | <u>456</u>       | Paired terrace to site JR05D-178, slackwater-type sediments                                                                                                                                                                    |
| JR05D-188                                                                         | Dunn                    | 555082                     | 3877285        | <u>453</u>       | Fan deposit overlying Mojave River fluvial terrace                                                                                                                                                                             |
| <i>Afton exit area, lacustrine deposits</i>                                       |                         |                            |                |                  |                                                                                                                                                                                                                                |
| M04-29A                                                                           | Dunn                    | <b>551371</b>              | <b>3880382</b> | <b>543.4</b>     | Barrier crest on east side of Dunn wash                                                                                                                                                                                        |
| M04-29B                                                                           | Dunn                    | <b>551242</b>              | <b>3880228</b> | <b>543.6</b>     | Barrier crest on west side of Dunn wash                                                                                                                                                                                        |
| M04-29C                                                                           | Dunn                    | <b>551063</b>              | <b>3879914</b> | <b>543.6</b>     | Barrier crest about 0.5 km west of Dunn wash                                                                                                                                                                                   |
| JR04D-1                                                                           | Dunn                    | 551349                     | 3880423        | <543             | On shoreface of beach barrier adjacent to site M04-29B; see Table 1 for <sup>14</sup> C age                                                                                                                                    |
| JR04D-105                                                                         | Dunn                    | 552788                     | 3881504        | 543              | Barrier crest north of Afton exit from Interstate 15                                                                                                                                                                           |
| M05-17                                                                            | Dunn                    | <b>549532</b>              | <b>3878048</b> | <b>544.1</b>     | Wavecut scarp angle in fan deposits                                                                                                                                                                                            |
| M05-19                                                                            | Dunn                    | <b>551751</b>              | <b>3879950</b> | <b>526</b>       | Section measured in multiple lake units separated by unconformities and paleosols along pipeline and roadcut; see Table 1 for <sup>14</sup> C age                                                                              |
| M05-20                                                                            | Dunn                    | <b>551586</b>              | <b>3880070</b> | <b>528</b>       | Section measured above basal tufa of green mud unit in upper Dunn wash; see Table 1 for <sup>14</sup> C age                                                                                                                    |
| M05-21                                                                            | Dunn                    | <b>551554</b>              | <b>3880198</b> | <b>535</b>       | Section measured in upper lake units in upper Dunn wash; see Table 1 for <sup>14</sup> C age                                                                                                                                   |
| M05-28                                                                            | Dunn                    | <b>551475</b>              | <b>3880092</b> | <b>532</b>       | Uppermost lake unit on flank of beach ridge, west side of Dunn wash; see Table 1 for <sup>14</sup> C age                                                                                                                       |
| <i>North Afton beach ridge and Shoreline hill, lacustrine deposits and scarps</i> |                         |                            |                |                  |                                                                                                                                                                                                                                |
| M04-32A/B                                                                         | Cave Mountain           | <b>558374</b>              | <b>3879150</b> | <b>558</b>       | Well bedded sands containing broken <i>Anodonta</i> shells in individual layers; apparently eolian sand sheets reworked from late Pleistocene lake deposits                                                                    |
| M04-40                                                                            | Cave Mountain           | <b>559462</b>              | <b>3877708</b> | <b>557.6</b>     | Well bedded sand and coarse silt, buried by angular colluvium, nearshore sorting/bedding; one fish scale                                                                                                                       |
| M04-48A                                                                           | Cave Mountain           | <b>558762</b>              | <b>3877324</b> | <b>540.4</b>     | North side of Shoreline hill; A is top of bench and shoreline angle cut on colluvium                                                                                                                                           |
| M04-48B                                                                           | Cave Mountain           | <b>558740</b>              | <b>3877277</b> | <b>543.8</b>     | North side of Shoreline hill; B is base of vertical bedrock scarp above A                                                                                                                                                      |
| M04-49A                                                                           | Cave Mountain           | <b>558704</b>              | <b>3877122</b> | <b>532.1</b>     | West side of Shoreline hill; A is top of bench with wave-rounded beach gravel and tufa (forms cliff)                                                                                                                           |
| M04-49B                                                                           | Cave Mountain           | <b>558706</b>              | <b>3877164</b> | <b>545.2</b>     | West side of Shoreline hill; B is base of vertical bedrock scarp above A                                                                                                                                                       |
| M04-50A                                                                           | Cave Mountain           | <b>558996</b>              | <b>3877083</b> | <b>538.6</b>     | South side of Shoreline hill, lowest scarp (shoreline angle?) on bedrock                                                                                                                                                       |
| M04-50B                                                                           | Cave Mountain           | <b>558984</b>              | <b>3877112</b> | <b>549.2</b>     | South side of Shoreline hill, higher scarp on bedrock above A                                                                                                                                                                  |
| M04-50C                                                                           | Cave Mountain           | <b>558986</b>              | <b>3877132</b> | <b>557.1</b>     | South side of Shoreline hill, higher scarp on bedrock above B                                                                                                                                                                  |
| M04-51                                                                            | Cave Mountain           | <b>559230</b>              | <b>3877141</b> | <b>554.5</b>     | Southeast side of Shoreline hill, well bedded sorted sand with heavy-mineral laminae, small-scale crossbedding, and locally back-dipping beds; two units interbedded with alluvial-fan deposits and separated by a buried soil |
| M05-22H                                                                           | Cave Mountain           | <b>557743</b>              | <b>3877975</b> | <b>538</b>       | North Afton beach ridge, from very top of ridge in youngest preserved lake unit; whole fragmented shells in growth position                                                                                                    |
| M05-23C                                                                           | Cave Mountain           | <b>557859</b>              | <b>3877558</b> | <b>515</b>       | North Afton beach ridge, section M05-23 on east side; shells are from base of oldest definite lake unit. Minimum-limiting age                                                                                                  |
| M05-25J                                                                           | Cave Mountain           | <b>557939</b>              | <b>3877984</b> | <b>521</b>       | North Afton beach ridge, section M05-25 on east side; shells are from top of oldest of three lake units. Minimum-limiting age                                                                                                  |
| M05-26F                                                                           | Cave Mountain           | <b>557685</b>              | <b>3877833</b> | <b>522</b>       | North Afton beach ridge, section M05-26 on east side; shells from top of oldest of three lake units and just below "interlacustral gravel" of Meek (1990); see Table 1 for <sup>14</sup> C age                                 |
| M05-62                                                                            | Cave Mountain           | <b>557457</b>              | <b>3878681</b> | <b>533.3</b>     | North Afton beach ridge, west side; whole in-situ shells in middle lake unit, 60 cm above "interlacustral gravel" of Meek (1990)                                                                                               |
| M05-28                                                                            | Dunn                    | <b>551475</b>              | <b>3880092</b> | <b>532</b>       | Uppermost lake unit on flank of beach ridge, west side of Dunn wash; see Table 1 for <sup>14</sup> C age                                                                                                                       |

| Station                                                      | USGS<br>7.5' quadrangle | UTM NAD 83 Zone 11<br>East | North          | Altitude<br>(m)* | Location notes                                                                                                                         |
|--------------------------------------------------------------|-------------------------|----------------------------|----------------|------------------|----------------------------------------------------------------------------------------------------------------------------------------|
| <i>Buwalda Ridge area, lacustrine deposits and scarps</i>    |                         |                            |                |                  |                                                                                                                                        |
| M04-74                                                       | Manix                   | 547524                     | 3875703        | 535              | Railroad cut northeast of Buwalda Ridge, 2 beach gravel units separated by paleosol; see Table 1 for <sup>14</sup> C age               |
| M04-75                                                       | Manix                   | <b>542363</b>              | <b>3870917</b> | <b>542</b>       | Upper lake unit in outcrop face; overlies lower lake unit; see Table 1 for <sup>14</sup> C age                                         |
| M04-76A                                                      | Manix                   | <b>542426</b>              | <b>3871043</b> | <b>564.2</b>     | Scarp angle above upper barrier; cut on indurated fanglomerate                                                                         |
| M04-76B                                                      | Manix                   | <b>542384</b>              | <b>3870998</b> | <b>550</b>       | Scarp angle in slope above M04-76C; cut in indurated fanglomerate                                                                      |
| M04-76C                                                      | Manix                   | <b>542345</b>              | <b>3871002</b> | <b>547.0</b>     | Highest point of packed pavement on upper barrier; soil pit lies at 546 m                                                              |
| M04-77                                                       | Manix                   | <b>542176</b>              | <b>3870977</b> | <b>537</b>       | Soil pit on lower barrier                                                                                                              |
| M05-06                                                       | Manix                   | 542784                     | 3870832        | 543              | Soil description on buried lake unit about 2 m below surface                                                                           |
| M05-07                                                       | Manix                   | 542730                     | 3870988        | 549              | Buwalda Ridge, north of Manix fault; uppermost limit of probable lake sediment in well sorted sand about 0.5 m below distinct paleosol |
| <i>Soldier Mountain area, lacustrine deposits and scarps</i> |                         |                            |                |                  |                                                                                                                                        |
| M04-20                                                       | Manix                   | <b>543128</b>              | <b>3868132</b> | <b>539.0</b>     | Sharp wave-cut scarp angle on bedrock, abundant rounded clasts below                                                                   |
| M04-20A                                                      | Manix                   | <b>543156</b>              | <b>3868112</b> | <b>546.8</b>     | Subdued scarp angle (color change) on bedrock, above M04-20                                                                            |
| M04-21A                                                      | Manix                   | <b>543176</b>              | <b>3867974</b> | <b>557.8</b>     | Subdued scarp angle on bedrock, above float contact of angular to rounded rhyolite clasts                                              |
| M04-21B                                                      | Manix                   | <b>543150</b>              | <b>3867960</b> | <b>554.6</b>     | Packed pavement with common rounded clasts below M04-21A                                                                               |
| M04-23                                                       | Manix                   | <b>542031</b>              | <b>3867455</b> | <b>536</b>       | Embayment below 543-m shoreline nearshore sand overlying weak Bt horizon formed on lacustrine mud; see Table 1 for <sup>14</sup> C age |
| M04-27A                                                      | Manix                   | 539334                     | 3866657        | 549              | Highest outcrop of lacustrine deposits                                                                                                 |
| M05-30                                                       | Manix                   | <b>542839</b>              | <b>3867712</b> | <b>558</b>       | Upper limit of packed pavement to west of site M04-21                                                                                  |
| <i>Harvard Hill, possible lacustrine deposits</i>            |                         |                            |                |                  |                                                                                                                                        |
| M04-13                                                       | Harvard Hill            | <b>530953</b>              | <b>3866516</b> | <b>557.8</b>     | Float contact of volcanic gravel above with granitic rounded pebbles below                                                             |
| M04-13A                                                      | Harvard Hill            | 531016                     | 3866416        | 558              | Float contact of volcanic gravel above with granitic rounded pebbles below                                                             |
| M04-13B                                                      | Harvard Hill            | 531106                     | 3866282        | 558              | Float contact of volcanic gravel above with granitic rounded pebbles below                                                             |
| M04-13C                                                      | Harvard Hill            | 531197                     | 3866100        | 558              | Float contact of volcanic gravel above with granitic rounded pebbles below                                                             |
| M04-14                                                       | Harvard Hill            | <b>531336</b>              | <b>3866042</b> | <b>556.1</b>     | Top of gentle, arcuate ridge composed of granitic sand and rounded pebbles                                                             |
| M04-15                                                       | Harvard Hill            | <b>531241</b>              | <b>3866372</b> | <b>555.2</b>     | Soil pit in granitic sand adjacent to above sites                                                                                      |
| <i>Troy Lake area, lacustrine deposits</i>                   |                         |                            |                |                  |                                                                                                                                        |
| M05-46A                                                      | Troy Lake               | <b>540348</b>              | <b>3858361</b> | <b>549.0</b>     | Barrier crest on east side of hill 1782; break in slope where barrier attaches to hill                                                 |
| M05-46B                                                      | Troy Lake               | <b>540361</b>              | <b>3858377</b> | <b>548.4</b>     | Barrier crest on E side of hill 1782; on broad barrier crest                                                                           |
| M05-48B                                                      | Troy Lake               | <b>540509</b>              | <b>3855722</b> | <b>546.1</b>     | Highest point of packed pavement above late Pleistocene beach ridge                                                                    |
| M05-48C                                                      | Troy Lake               | <b>540530</b>              | <b>3855722</b> | <b>544.5</b>     | Flat broad barrier crest; late Pleistocene beach ridge                                                                                 |
| M05-48D                                                      | Troy Lake               | <b>540632</b>              | <b>3855730</b> | <b>549.1</b>     | Scarp angle on basalt hill east of Troy Lake beach ridge                                                                               |
| M05-48E                                                      | Troy Lake               | <b>540470</b>              | <b>3855678</b> | <b>544.4</b>     | Top of main Troy Lake beach ridge on south side of hill                                                                                |
| M05-49                                                       | Troy Lake               | <b>540539</b>              | <b>3855312</b> | <b>545.0</b>     | Top of Troy Lake beach ridge adjacent to arroyo cut                                                                                    |
| M06-54                                                       | Troy Lake               | <b>541043</b>              | <b>3853881</b> | <b>544.2</b>     | Low, indistinct beach ridge of late Pleistocene highstand                                                                              |
| M06-55A                                                      | Troy Lake               | <b>541392</b>              | <b>3853789</b> | <b>548.2</b>     | Wavecut scarp angle on basalt hill; well defined                                                                                       |
| M06-57                                                       | Troy Lake               | <b>541704</b>              | <b>3853755</b> | <b>554.7</b>     | Highest point of tombolo composed of beach gravel extending north from basalt hill                                                     |
| M06-58                                                       | Troy Lake               | <b>541924</b>              | <b>3853885</b> | <b>555.6</b>     | Probable beach sand and gravel, mod well sorted pebble gravel and sand                                                                 |

\* Bold font indicates differentially corrected GPS data; altitudes not in bold font estimated from topographic map using handheld GPS location. Underlined italic font indicates altitudes from NASA ATM-III LIDAR data acquired September, 2003, funded by the U.S. Army Corps of Engineers, WRAP program R. Lichvar & D. Finnegan.
